# Supplementary material for: Genomic Analysis of CTX-M-Group-1-Producing Extraintestinal Pathogenic E. coli (ExPEc) from Patients with Urinary Tract Infections (UTI) from Colombia
Source: PubMed Central journal article supplement (PMC7763464; doi:10.3390/antibiotics9120899), 2020-12-13
Supplement: antibiotics-09-00899-s001.pdf [file antibiotics-09-00899-s001.pdf]

**Figure S1.** Virulence genotypes and incompatibility plasmids of the studied isolates. Black squares represent the presence of the respective virulence gene or incompatibility plasmid, and grey represents its absence. (\*) Isolates recovered from blood samples.
